# Supplementary material for: Presence of the tunicate Asterocarpa humilis on ship hulls and aquaculture facilities in the coast of the Biobío Region, south central Chile
Source: PubMed Central journal article supplement (PMC5560234; doi:10.7717/peerj.3672), 2017-08-14
Supplement: peerj-05-3672-s002.pdf [file peerj-05-3672-s002.pdf]

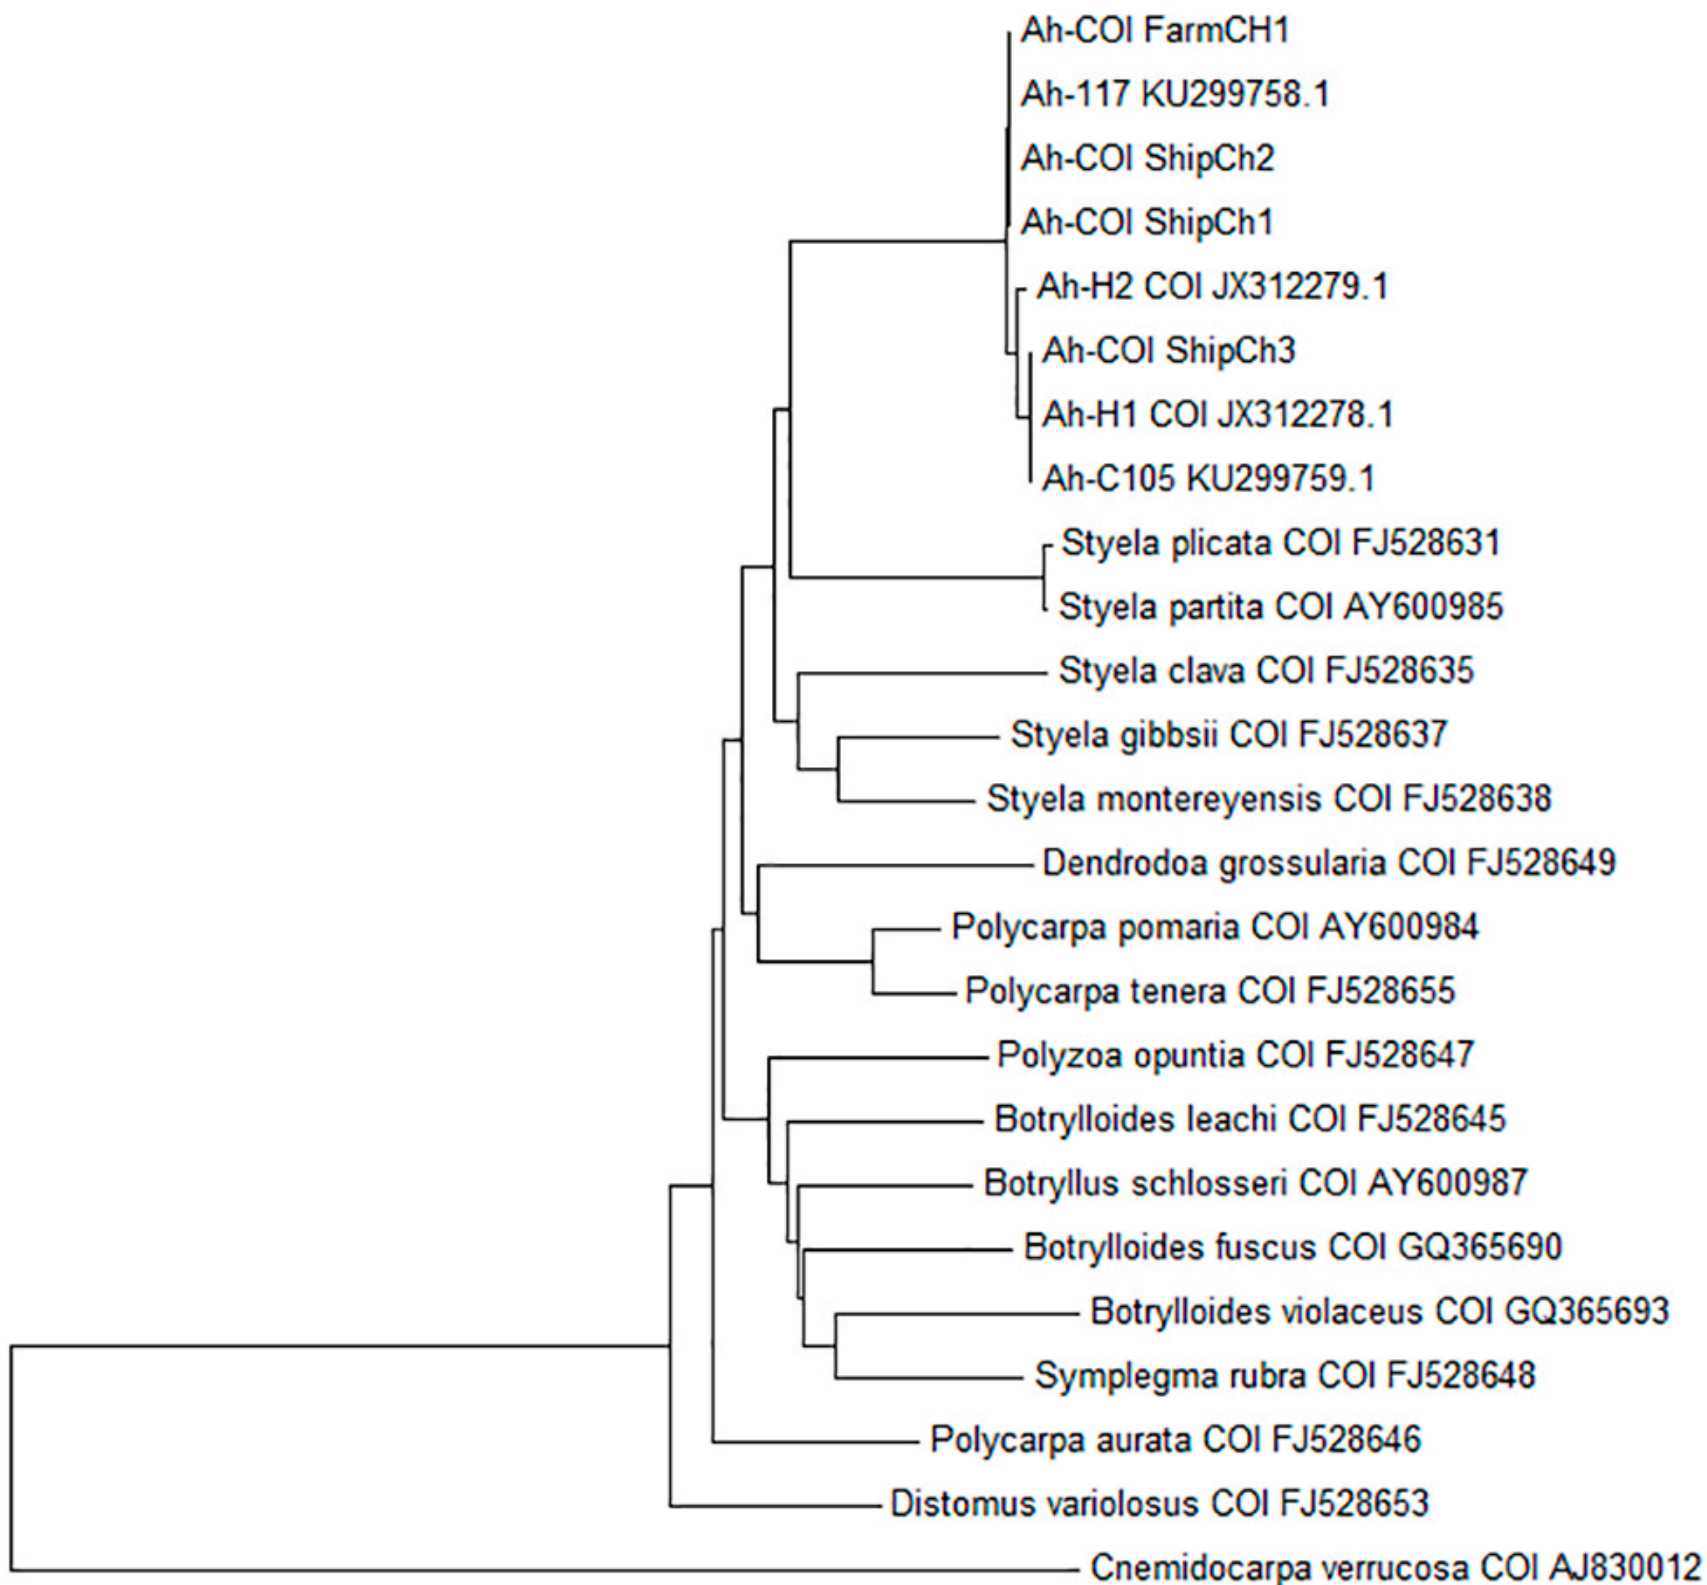

0.10
